# Supplementary material for: Impact of Inhaled Nitric Oxide on the Sulfatide Profile of Neonatal Rat Brain Studied by TOF-SIMS Imaging
Source: MDPI journal article supplement (doi:10.3390/ijms15045233), 2014-03-25

## Supplementary Information

**Figure S1.** Mean relative ion peak intensities of 6 fatty acids, cholesterol and Vitamin E calculated from a triplicate analysis of P10 rat brain tissues (exposed to air and iNO) with their standard deviations. No significant variation was observed as analyzed using a student test ( $p > 0.05$ ).

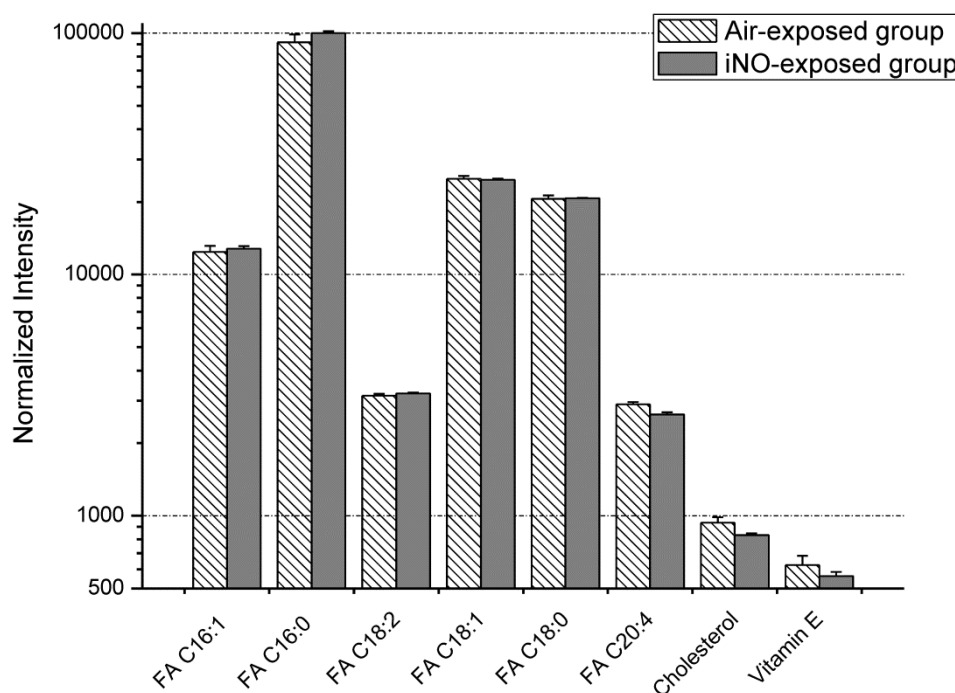

Supplement: s1 [file s1]
